# Supplementary material for: Familiarity affects other-regarding preferences in pet dogs
Source: PubMed Central journal article supplement (PMC4680958; doi:10.1038/srep18102), 2015-12-16
Supplement: srep18102-s1.pdf [file srep18102-s1.pdf]

**Title:** Familiarity affects other-regarding preferences in pet dogs

**Authors:** Mylene Quervel-Chaumette<sup>1\*</sup>, Rachel Dale<sup>1,2\*</sup>, Sarah Marshall-Pescini<sup>1,2</sup>, Friederike Range<sup>1,2</sup>

**Affiliations:**

<sup>1</sup> Comparative Cognition, Messerli Research Institute, University of Veterinary Medicine, University of Vienna, 1 Veterinärplatz, 1210 Vienna, Austria.

<sup>2</sup> Wolf Science Center, Dörfles 48A – 2115 Ernstbrunn, Austria.

\*Correspondence to:

Mylene Quervel-Chaumette

Comparative Cognition, Messerli Research Institute, University of Veterinary Medicine, University of Vienna, Vienna, Austria.

1 Veterinärplatz,

1210 Wien

Austria

Tel: 0043-69917366265

[mylene.chaumette@vetmeduni.ac.at](mailto:mylene.chaumette@vetmeduni.ac.at)

Rachel Dale

Tel : 0043-69918332188

[rachel.dale@vetmeduni.ac.at](mailto:rachel.dale@vetmeduni.ac.at)

# Supplementary Information

## SI Results

All statistics were run in R (version 3.1.2 for windows)

### Number of trials, pulls and giving-pulls.

Donors could end the session by either refusing to pull on five consecutive trials or refusing to sit on the start location despite five consecutive requests from the experimenter. Therefore, the first measure to consider was the total number of trials across conditions.

Then, within a trial, donors could decide to pull a tray or not to pull it. Furthermore, if they decided to pull, they could either pull the giving tray or the empty tray. Hence we also took into account the total number of pulls regardless of tray choice (i.e. including both giving pulls and empty pulls) and the number of giving pulls across conditions (i.e. pulling the tray that delivered food to the partner enclosure).

Preliminary analyses were carried out to investigate the potential correlation between these three dependant variables (Pearson's correlation test).

Results showed a strong correlation between the three possible dependant variables (see table S2), in that if donor dogs chose to participate in a trial they normally pulled a tray, and if they pulled a tray it was in most cases the baited tray (see Table S2 and Fig S1). Therefore the number of giving pulls was chosen as the dependent measure for further analyses as this quantifies the food delivered to the receiver enclosure and thus represents the best measure of other-regarding preferences.

### Number of Giving-pulls

We used both AIC calculation and the likelihood ratio testing to assess the statistical influences of the various explanatory factors. In order to examine if the number of giving pulls differed across sessions and conditions, generalized linear models GLMM [31], correcting for overdispersion by using the glmmADMB package and function, were used with the donor's identity as a random factor and the number of 'giving-pulls' as the response factor. The order of sessions (i.e. first to fifth, to check for order effects) and condition (familiar test, stranger test, familiar social facilitation control, stranger social facilitation control and non-social control) as well as the interaction between session and condition were included in the model as explanatory factors. The model revealed no interaction effect on the response variable. However, the order of sessions as well as the condition influenced the number of giving-pulls performed by the donor (see table S3, Fig S2 and Fig 3). We corrected for multiple testing by using a Bonferroni correction.

### Percentage of success in the knowledge-probe trials

In order to ensure that dogs understood the contingency of the task and that even when paired with a stranger, dogs were still comfortable enough to manipulate the apparatus if they could obtain food for themselves, four knowledge-probe trials were run at the end of each test and control condition. In these four trials, the food was placed either on the top or bottom shelf in

front of the donor enclosure. This time, pulling the baited tray delivered food to the donor enclosure only. All dogs always pulled on knowledge-probe trials (Fig S3).

### **Other behaviors exhibited during testing**

The video recordings of the test and control sessions were coded with Solomon Coder Beta 15.01.13 (Copyright András Péter, <http://solomoncoder.com>). We coded all occurrences of scratching, yawning, lips-licking and attempting to leave the donor enclosure and combined them in a single category dubbed ‘stress behaviors’. The presence of agonistic behavior (growling, snapping and threatening) was coded as a binary variable (0 for none, 1 if it occurred in a session). Finally, we coded the frequency with which the partners (familiar and stranger) tried to reach the reward by, for example scratching at the fence/apparatus (See table S4 for details of the ethogram adopted). The behavior coding was done by one author (MC) and twenty percent of the videos (N = 16) were coded by a second observer (RD). Cronbach’s alpha coefficient was used to measure the level of agreement. For all variables and behaviors the alpha was between 0.86 and 1, which corresponds to a high level of agreement [32].

### ***Stress behaviors***

Linear mixed models using the lme function and the packages “lme4” were run with the identity of the donor as a random effect, the percentage of duration of “stress behaviors” as response factors and session and conditions as fixed factors. The statistical significance of the full model was tested by comparing it to a null model (“conditions” excluded) by using a likelihood ratio test (R function “anova” see table S3).

The comparison between the two models did not result in a significant reduction of fit. This indicates that the condition did not influence the frequency of stress behaviors exhibited by the donors (likelihood ratio test:  $\chi^2=3.68$ ;  $p=0.45$ ).

### ***Agonistic behaviors***

Four dogs growled once when paired with the stranger dog in the test condition but no agonistic behaviors occurred in the other conditions rendering statistical comparison across conditions impossible. Overall, donor dogs did not show agonistic behaviors towards partners. The receiver dogs did not show any agonistic behaviors.

### ***Reaching for the food***

Finally, a Pearson’s correlation test between the number of giving pulls and the frequency of reaching for the food by the partner in the test was used to examine whether donors were more likely to provide food when the partner tried to reach the food.

In both test conditions (familiar and stranger), no significant correlations were found between reaching for the food and the number of giving pulls (F.test:  $r_s=0.25$   $\text{mean}_{\text{reach for food}} = 9.3$ ,  $\text{mean}_{\text{Giving}} = 20.4$ ; S.test:  $r_s=0.17$ ,  $\text{mean}_{\text{reach for food}} = 9.3$ ,  $\text{mean}_{\text{Giving}} = 8.9$  ;  $n=16$  ).

## SI Tables (S1-S4)

Table.S1. Age, sex and breed of the donors and receivers participating in the experiment

| Donor's name | Donor's Sex | Donor's Age | Donor's breed            | Number of training session before testing | Familiar partner's name | Familiar Partner's Age | Familiar Partner Breed      | Stranger partner's Name | Stranger partner's Breed | Receiver's Name | Receiver's Sex |
|--------------|-------------|-------------|--------------------------|-------------------------------------------|-------------------------|------------------------|-----------------------------|-------------------------|--------------------------|-----------------|----------------|
| Finn         | Male        | 11          | Australian Shepherd      | 4                                         | Juno                    | 3                      | Australian Shepherd         | Lola                    | Mixed breed              |                 | Female         |
| Luke         | Male        | 10          | Border Collie            | 2                                         | Quismo                  | 8                      | Border Collie               | Buck                    | Beagle                   |                 | Male           |
| Joker        | Male        | 8           | Border Collie            | 2                                         | Ally                    | 7                      | Sheltie                     | Lola                    | Mixed breed              |                 | Female         |
| Ultimo       | Male        | 6           | Border Collie            | 2                                         | Sokrates                | 9                      | Bardino-Podenco Canario-Mix | Buck                    | Beagle                   |                 | Male           |
| Talie        | Male        | 4           | Husky                    | 4                                         | Luna                    | 2                      | Husky                       | Lola                    | Mixed breed              |                 | Female         |
| Casper       | Male        | 3           | Border Collie            | 2                                         | Ninni                   | 2                      | Irish Wolfhound             | Lola                    | Mixed breed              |                 | Female         |
| Mago         | Male        | 11          | Golden Retriever         | 2                                         | Tika                    | 8                      | Husky-Golden Retriever mix  | Lola                    | Mixed breed              |                 | Female         |
| Bounty       | Female      | 9           | Australian Shepherd      | 2                                         | Juno                    | 3                      | Australian Shepherd         | Lola                    | Mixed breed              |                 | Female         |
| Achuck       | Female      | 8           | Chesapeake bay retriever | 2                                         | Elrond                  | 5                      | Chesapeake bay retriever    | Michel                  | Mixed breed              |                 | Male           |
| Chio         | Female      | 8           | Border collie            | 2                                         | Sonic                   | 7                      | Terrier                     | Michel                  | Mixed breed              |                 | Male           |
| Neela        | Female      | 7           | Australian Shepherd      | 3                                         | Leni                    | 2                      | Australian Shepherd         | Lola                    | Mixed breed              |                 | Female         |
| Chasie       | Female      | 6           | Border Collie            | 2                                         | Gatsby                  | 3                      | Border Collie               | Buck                    | Beagle                   |                 | Male           |
| Faye         | Female      | 6           | Border Collie            | 2                                         | Ini                     | 11                     | Border Collie               | Lola                    | Mixed breed              |                 | Female         |
| Mali         | Female      | 6           | Mixed breed              | 3                                         | Jacob                   | 11                     | Parson Russell Terrier      | Michel                  | Mixed breed              |                 | Male           |
| Sunny        | Female      | 3           | Mixed breed              | 2                                         | Lizzy                   | 12                     | West Highland White Terrier | Lola                    | Mixed breed              |                 | Female         |
| Flappi       | Female      | 6           | Pumi-Mixed breed         | 2                                         | Joey                    | 6                      | Mixed breed                 | Buck                    | Beagle                   |                 | Male           |

Table.S2. Matrix of Pearson's correlation coefficient between the three potential dependant variables.

| <b>Pearson's correlation coefficient</b> | <b>Number of trials</b> | <b>Number of total pulls</b> | <b>Number of giving pulls</b> |
|------------------------------------------|-------------------------|------------------------------|-------------------------------|
| Number of trials                         | NA                      | NA                           | NA                            |
| Number of total pulls                    | R=0.95                  | NA                           | NA                            |
| Number of giving pulls                   | R=0.95                  | R=0.99                       | NA                            |

Table. S3. AIC value for model selection and likelihood ratio tests comparing final reduced and full models

| Variable               |                              | AIC        |         |
|------------------------|------------------------------|------------|---------|
| Number of Giving Pulls | Full model                   | 540.6      |         |
|                        | Model1: Interaction out      | 536.2      |         |
|                        | Session out                  | 546.3      |         |
|                        | Condition out                | 547.3      |         |
| Number of Giving Pulls | Model comparison             | Chi Square | p-value |
|                        | Model 1 versus Full model    | 4.1408     | =0.459  |
|                        | Session out versus Model 1   | 13.129     | <0.001  |
|                        | Condition out versus Model1  | 47.960     | <0.001  |
| Stress Behavior        | Condition out versus Model 1 | 5.2145     | =0.256  |

Table.S4. Ethogram.

| Behaviors             | Definition                                                                                                                                                                                                                                                |
|-----------------------|-----------------------------------------------------------------------------------------------------------------------------------------------------------------------------------------------------------------------------------------------------------|
|                       | Yawning<br>Opening the mouth wide and then closing it.                                                                                                                                                                                                    |
| Stress behaviors      | Lips-licking<br>To lick the lips                                                                                                                                                                                                                          |
|                       | Attempt to leave enclosure<br>The body is orientated toward the exit. The nose is touching the end of the fence. Dogs may be pushing the fence with the head or pawing at it or simply standing in front of the exit.                                     |
| Agonistic behaviors   | Scratching<br>Scratching any part of the body                                                                                                                                                                                                             |
|                       | Threat<br>Subject orients towards another performing one or more of the following: staring at, curling of the lips, baring of the canines, raising the hackles, snarling, growling, and barking, sometimes with the tail perpendicular or above the back. |
| Reaching for the food | Snapping<br>To snap teeth into the air, noisily.<br>.....<br>The partner scratches the front fence of the enclosure or puts the paw through the fence towards the tray                                                                                    |

**SI Figures (S1-S3)**

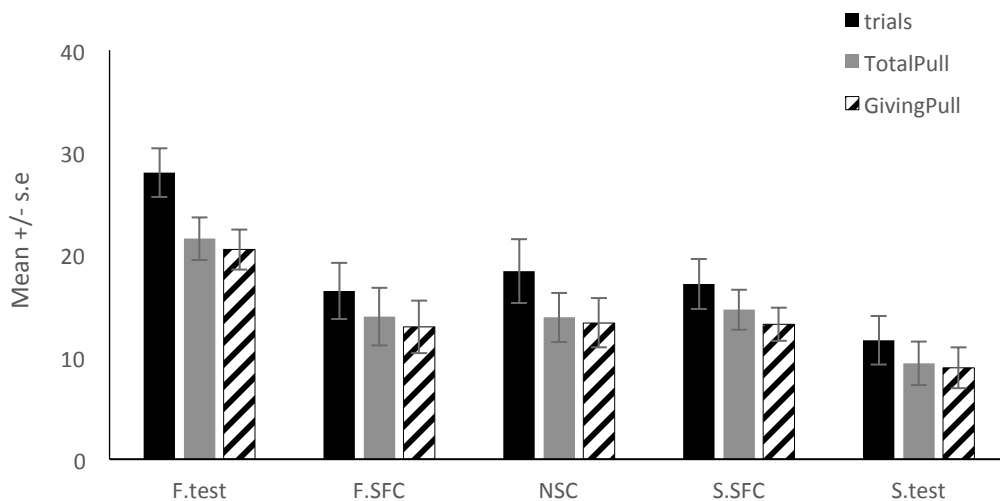

Fig.S1. Mean number of trials, pulls and giving pulls  $\pm$  s.e (standard error bars) performed by the donors across conditions.

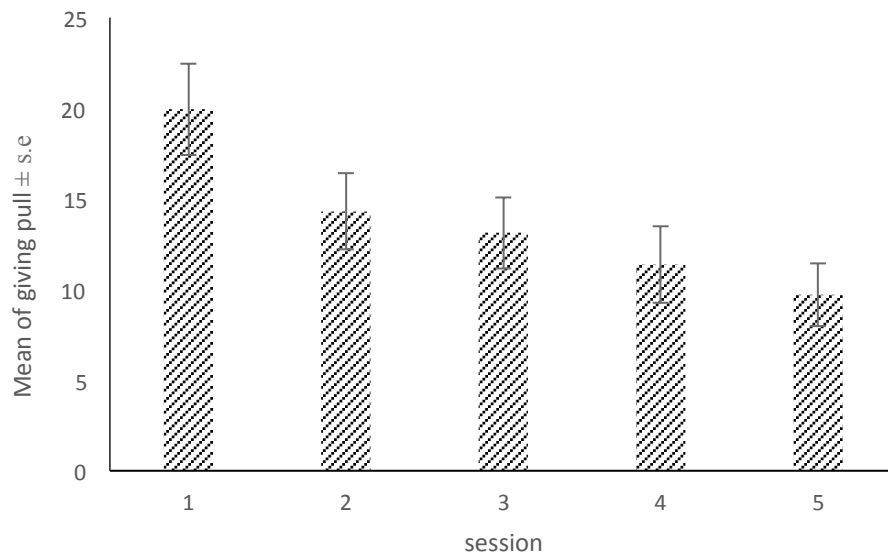

Fig.S2. The number of giving pulls decreases across session (session (likelihood ratio test:  $\chi^2=-13.129$ ;  $p<0.001$ )).

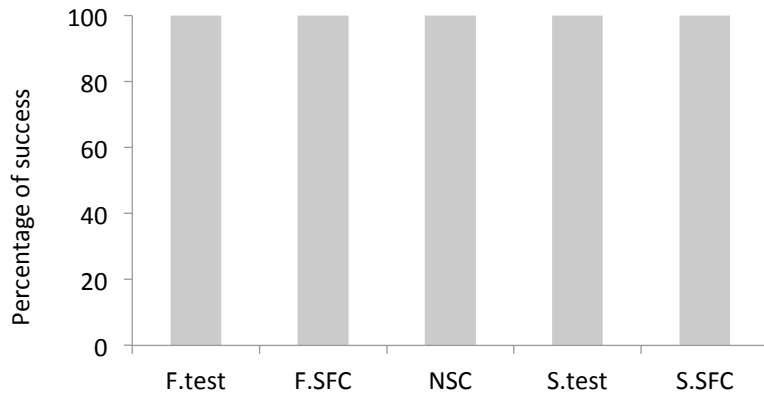

Fig.S3. Percentage of pulling the baited tray during the knowledge-probe trials by the donors at the end of each condition.

### SI Movie

Video clip demonstrating each of the conditions: a) motivation control, b) stranger test, c) stranger social facilitation control, d) familiar test, e) familiar social facilitation control and f) non-social control.

### Supplemental References (31-32)

31. Fournier DA, Skaug HJ, Ancheta J, Lanelli J, Magnusson A, Maunder M.N, Nielsen A, Sibert J (2012). AD Model Builder: using automatic differentiation for statistical inference of highly parameterized complex nonlinear models. *Optim. Methods Softw.* 27:233–249.
32. Nunnally IH, Bernstein JC (1994) Psychometric theory (3rd ed.). *PsycCRITIQUES.* 24:275-280.
